# Supplementary material
Source: Research Square preprint supplement (doi:10.21203/rs.3.rs-10071313/v1)
Supplement: Supplementary file 1 [file a321a019b5bfa3b7139a208e.docx]

**Supplementary material**

**Table S1.** *Model Comparison for the Exploratory Two-Indicator Latent Profile Analysis*

| **Classes / covariance structure** | **AIC** | **BIC** | **Entropy** | **Class sizes** |
| --- | --- | --- | --- | --- |
| 1 / Spherical | 2813.04 | 2823.25 | - | 222 |
| 1 / Diagonal | 2811.01 | 2824.62 | - | 222 |
| 1 / Tied | 2793.75 | 2810.76 | - | 222 |
| 1 / Full | 2793.75 | 2810.76 | - | 222 |
| 2 / Spherical | 2750.91 | 2774.73 | .61 | 129, 93 |
| 2 / Diagonal | 2753.30 | 2783.92 | .53 | 118, 104 |
| 2 / Tied | 2780.99 | 2808.21 | .67 | 150, 72 |
| 2 / Full | 2780.08 | 2817.50 | .60 | 86, 136 |
| 3 / Spherical | 2745.28 | 2782.71 | .52 | 78, 79, 65 |
| 3 / Diagonal | 2746.53 | 2794.17 | .61 | 75, 50, 97 |
| 3 / Tied | 2769.77 | 2807.20 | .61 | 26, 154, 42 |
| 3 / Full | 2736.43 | 2794.27 | .63 | 79, 47, 96 |
| 4 / Spherical | 2746.41 | 2797.45 | .67 | 85, 20, 77, 40 |
| 4 / Diagonal | 2744.54 | 2809.19 | .64 | 75, 23, 79, 45 |
| 4 / Tied | 2757.81 | 2805.45 | .73 | 107, 23, 61, 31 |
| 4 / Full | 2740.25 | 2818.51 | .63 | 87, 67, 27, 41 |
